# Supplementary material for: Spatial heterogeneity of infiltrating T cells in high-grade serous ovarian cancer revealed by multi-omics analysis
Source: PubMed Central journal article supplement — Cell Rep Med. 2022 Dec 20;3(12):100856. doi: 10.1016/j.xcrm.2022.100856 (PMC9798026; doi:10.1016/j.xcrm.2022.100856), 2022-12-20
Supplement: mmc1.pdf [file mmc1.pdf]

**Cell Reports Medicine, Volume 3**

**Supplemental information**

**Spatial heterogeneity of infiltrating T cells  
in high-grade serous ovarian cancer  
revealed by multi-omics analysis**

**Bin Yang, Xiong Li, Wei Zhang, Junpeng Fan, Yong Zhou, Wenting Li, Jingjing Yin, Xiaohang Yang, Ensong Guo, Xi Li, Yu Fu, Si Liu, Dianxing Hu, Xu Qin, Yingyu Dou, Rourou Xiao, Funian Lu, Zizhuo Wang, Tianyu Qin, Wei Wang, Qinghua Zhang, Shuaicheng Li, Ding Ma, Gordon B. Mills, Gang Chen, and Chaoyang Sun**

# **Spatial Heterogeneity of Infiltrating T cells in High-Grade Serous Ovarian Cancer revealed by Multi-omics analysis**

## **Authors and Affiliations**

Bin Yang<sup>1#</sup>, Xiong Li<sup>2#</sup>, Wei Zhang<sup>3#</sup>, Junpeng Fan<sup>1#</sup>, Yong Zhou<sup>3</sup>, Wenting Li<sup>1</sup>, Jingjing Yin<sup>1</sup>, Xiaohang Yang<sup>1</sup>, Ensong Guo<sup>1</sup>, Xi Li<sup>1</sup>, Yu Fu<sup>1</sup>, Si Liu<sup>1</sup>, Dianxing Hu<sup>1</sup>, Xu Qin<sup>1</sup>, Yingyu Dou<sup>1</sup>, Rourou Xiao<sup>1</sup>, Funian Lu<sup>1</sup>, Zizhuo Wang<sup>1</sup>, Tianyu Qin<sup>1</sup>, Qinghua Zhang<sup>2</sup>, Shuaicheng Li<sup>3</sup>, Ding Ma<sup>1</sup>, Gordon B. Mills<sup>4,5</sup>, Gang Chen<sup>1\*</sup>, Chaoyang Sun<sup>1\*</sup>

1. Department of Obstetrics and Gynecology, Tongji Hospital, Tongji Medical College, Huazhong University of Science and Technology, Wuhan 430030, China.
2. Department of Gynecology & Obstetrics, the Central Hospital of Wuhan, Tongji Medical College, Huazhong University of Science and Technology, Wuhan, P.R. China.
3. City University of Hong Kong, Shenzhen Research Institute, Shenzhen 518083, China.
4. Department of Cell, Development and Cancer Biology, Oregon Health and Sciences University, Portland, OR 97201, USA; Knight Cancer Institute, Portland, OR 97201,
5. Department of Systems Biology, University of Texas MD Anderson Cancer Center, Houston, TX 77030, USA.

# These authors contribute equally

**Supplementary Table 1. Treatment-naive HGSOC sampling and bio-informative data.** Related to Figure 1

and Figure 2.

| CASE_ID | AGE | DIAGNOSIS | STAGE | SITE       | scRNA-seq   |     |         |         |     | Tumor Purity | HRD score | TMB    |
|---------|-----|-----------|-------|------------|-------------|-----|---------|---------|-----|--------------|-----------|--------|
|         |     |           |       |            | CELL NUMBER | WGS | RNA-seq | TCR-seq | IHC |              |           |        |
| OV001   | 53  | HGSOC     | IIIC  | OV001-M_O  | -           | No  | No      | YES     | YES | 0            | -         | -      |
|         |     |           |       | OV001-T_L  | -           | YES | YES     | YES     | YES | 0.2          | 11        | 0.8257 |
|         |     |           |       | OV001-M_P1 | -           | YES | YES     | YES     | YES | 0.4          | 16        | 0.8646 |
|         |     |           |       | OV001-M_P2 | -           | YES | YES     | YES     | YES | 0.8          | 15        | 0.8668 |
|         |     |           |       | OV001-M_A  | -           | YES | YES     | YES     | YES | 0.2          | 7         | 0.8525 |
|         |     |           |       | OV001-B    | -           | YES | No      | No      | No  | -            | -         | -      |
| OV002   | 58  | HGSOC     | IIIC  | OV002-T_L  | -           | YES | YES     | YES     | YES | 0.9          | 55        | 1.5346 |
|         |     |           |       | OV002-T_R  | -           | YES | YES     | YES     | YES | 0.9          | 52        | 1.5439 |
|         |     |           |       | OV002-M_O1 | -           | YES | YES     | YES     | YES | 0.9          | 53        | 1.6254 |
|         |     |           |       | OV002-M_O2 | -           | YES | YES     | YES     | YES | 0.2          | 23        | 1.4000 |
|         |     |           |       | OV002-M_O3 | -           | YES | YES     | YES     | YES | 0.4          | 47        | 1.4561 |
|         |     |           |       | OV002-M_P  | -           | YES | YES     | YES     | YES | 0.9          | 54        | 1.6157 |
| OV003   | 65  | HGSOC     | IIIA  | OV002-B    | -           | YES | No      | No      | No  | -            | -         | -      |
|         |     |           |       | OV003-M_A  | -           | YES | YES     | YES     | YES | 0.8          | 57        | 2.0129 |
|         |     |           |       | OV003-T_R1 | -           | YES | YES     | YES     | YES | 0.8          | 65        | 2.0486 |
|         |     |           |       | OV003_T_R2 | -           | YES | YES     | YES     | YES | 0.8          | 62        | 1.9839 |
|         |     |           |       | OV003-B    | -           | YES | No      | No      | No  | -            | -         | -      |
| OV004   | 25  | HGSOC     | IIIB  | OV004-T_L1 | 10017       | YES | YES     | YES     | YES | 0.9          | 53        | 1.5425 |
|         |     |           |       | OV004-M_P  | 6761        | YES | YES     | YES     | YES | 0.5          | 45        | 1.7114 |
|         |     |           |       | OV004-T_L2 | 5285        | YES | YES     | YES     | YES | 0.9          | 52        | 1.4589 |
|         |     |           |       | OV004-T_R  | 3428        | YES | YES     | YES     | YES | 0.9          | 52        | 1.4857 |
|         |     |           |       | OV004-B    | -           | YES | No      | No      | No  | -            | -         | -      |

|       |    |       |      |            |       |       |      |         |      |      |    |        |
|-------|----|-------|------|------------|-------|-------|------|---------|------|------|----|--------|
| OV005 | 41 | HGSOC | IIC  | OV005-T_L  | 5777  | YES   | YES  | YES     | YES  | 0.9  | 74 | 3.3729 |
|       |    |       |      | OV005-T_R2 | 5961  | YES   | YES  | YES     | YES  | 0.9  | 72 | 3.4000 |
|       |    |       |      | OV005-T_R1 | 5417  | YES   | YES  | YES     | YES  | 0.9  | 75 | 3.3139 |
|       |    |       |      | OV005-M_P  | 6331  | YES   | YES  | YES     | YES  | 0.6  | 76 | 3.1675 |
|       |    |       |      | OV005-B    | 11681 | YES   | No   | No      | No   | -    | -  | -      |
| OV006 | 52 | HGSOC | IIA  | OV006-T_L  | 10864 | YES   | YES  | YES     | YES  | 0.7  | 22 | 0.7068 |
|       |    |       |      | OV006-T_R  | 7776  | YES   | YES  | YES     | YES  | 0.9  | 13 | 0.8018 |
|       |    |       |      | OV006-B    | 12398 | YES   | No   | No      | No   | -    | -  | -      |
| OV008 | 70 | HGSOC | IIIC | OV008-B    | 10430 | YES   | No   | No      | No   | -    | -  | -      |
|       |    |       |      | OV008-T_L  | -     | YES   | YES  | YES     | YES  | 0.3  | -  | 2.4261 |
|       |    |       |      | OV008-T_R  | 4513  | YES   | YES  | YES     | YES  | 0.4  | 58 | 2.4514 |
|       |    |       |      | OV008-M_O1 | 9480  | YES   | YES  | YES     | YES  | 0.2  | 49 | 2.2689 |
|       |    |       |      | OV008-M_O2 | 6454  | YES   | YES  | YES     | YES  | 0.2  | 50 | 2.3221 |
|       |    |       |      | OV008-M_O3 | 7973  | YES   | YES  | YES     | YES  | 0.2  | 57 | 2.3050 |
|       |    |       |      | OV009      | 49    | HGSOC | IIIC | OV009-B | 4917 | YES  | No | No     |
|       |    |       |      | OV009-T_L  | 9113  | No    | No   | YES     | YES  | 0    | -  | -      |
|       |    |       |      | OV009-T_R  | 8917  | YES   | YES  | YES     | YES  | 0.6  | 72 | 2.8246 |
|       |    |       |      | OV009-M_O1 | 6512  | YES   | YES  | YES     | YES  | 0.1  | 55 | 2.5175 |
|       |    |       |      | OV009-M_O2 | 5621  | YES   | YES  | YES     | YES  | 0.4  | 73 | 3.3479 |
|       |    |       |      | OV009-M_P  | 4881  | No    | No   | YES     | YES  | 0    | -  | -      |
| OV010 | 66 | HGSOC | IIIC | OV010-M_O1 | 7592  | YES   | YES  | YES     | YES  | 0.4  | 71 | 4.2043 |
|       |    |       |      | OV010-T_R2 | 8312  | No    | No   | YES     | YES  | 0    | -  | -      |
|       |    |       |      | OV010-M_O2 | 9915  | YES   | YES  | YES     | YES  | 0.2  | 61 | 3.9368 |
|       |    |       |      | OV010-T_R1 | 10924 | YES   | YES  | YES     | YES  | 0.4  | 71 | 4.1718 |
|       |    |       |      | OV010-M_A  | 10591 | YES   | YES  | YES     | YES  | 0.15 | 68 | 3.9132 |
|       |    |       |      | OV010-B    | 9928  | YES   | No   | No      | No   | -    | -  | -      |

M/T:Metastatic/situ lesion, \_TR/L:Right ovary/Left ovary, \_O/P/A: Omentum/pelvic/abdominic metastatic. POD:progressive disease or death due to progressive disease

**Supplementary Table 2. Single cell RNA-seq quality control processing. Related to Figure 2.**

| <b>Sample</b> | <b>Raw cells</b> | <b>Mean UMIs</b> | <b>Mean genes</b> | <b>Cells (MT&gt;20%)</b> | <b>Doublers</b> | <b>N.O. of non-Tcells<sup>a</sup></b> | <b>N.O. of T cells</b> |
|---------------|------------------|------------------|-------------------|--------------------------|-----------------|---------------------------------------|------------------------|
| OV004-M-P     | 8567             | 4542             | 1593              | 157                      | 420             | 71                                    | 6761                   |
| OV004-T-L1    | 12269            | 4805             | 1661              | 184                      | 603             | 54                                    | 10017                  |
| OV004-T-L2    | 8851             | 4154             | 1513              | 271                      | 427             | 104                                   | 5285                   |
| OV004-T-R     | 5146             | 3975             | 1426              | 113                      | 250             | 47                                    | 3428                   |
| OV005-B       | 12805            | 4758             | 1419              | 322                      | 624             | 1                                     | 11681                  |
| OV005-M-P     | 8646             | 4477             | 1423              | 642                      | 400             | 1                                     | 6331                   |
| OV005-T-L     | 8285             | 5369             | 1665              | 739                      | 375             | 16                                    | 5777                   |
| OV005-T-R1    | 7902             | 6417             | 1870              | 1004                     | 340             | 18                                    | 5417                   |
| OV005-T-R2    | 8670             | 6057             | 1799              | 1080                     | 376             | 27                                    | 5961                   |
| OV006-B       | 13342            | 4579             | 1506              | 92                       | 662             | 6                                     | 12398                  |
| OV006-T-L     | 13944            | 5045             | 1637              | 284                      | 681             | 62                                    | 10864                  |
| OV006-T-R     | 10544            | 4818             | 1577              | 495                      | 470             | 8                                     | 7776                   |
| OV008-B       | 11168            | 4911             | 1605              | 34                       | 557             | 1                                     | 10430                  |
| OV008-M-O1    | 11622            | 5307             | 1638              | 467                      | 556             | 18                                    | 9480                   |
| OV008-M-O2    | 8265             | 4179             | 1486              | 413                      | 392             | 1                                     | 6454                   |
| OV008-M-O3    | 10493            | 3564             | 1332              | 454                      | 502             | 5                                     | 7973                   |
| OV008-T-R     | 5272             | 7137             | 2110              | 80                       | 259             | 6                                     | 4513                   |
| OV009-B       | 5905             | 4695             | 1360              | 226                      | 284             | 1                                     | 4917                   |
| OV009-M-O1    | 8667             | 5725             | 1631              | 520                      | 406             | 2                                     | 6512                   |
| OV009-M-O2    | 7982             | 4807             | 1497              | 292                      | 384             | 35                                    | 5621                   |
| OV009-M-P     | 6424             | 4523             | 1533              | 192                      | 311             | 1                                     | 4881                   |
| OV009-T-L     | 12190            | 4753             | 1654              | 1334                     | 541             | 2                                     | 9113                   |
| OV009-T-R     | 11623            | 4869             | 1731              | 809                      | 540             | 0                                     | 8917                   |
| OV010-B       | 10715            | 5336             | 1745              | 22                       | 534             | 3                                     | 9928                   |
| OV010-M-A     | 13157            | 4738             | 1622              | 182                      | 648             | 0                                     | 10591                  |
| OV010-M-O1    | 9568             | 5072             | 1771              | 216                      | 467             | 4                                     | 7592                   |

|            |       |      |      |     |     |    |       |
|------------|-------|------|------|-----|-----|----|-------|
| OV010-M-O2 | 11941 | 5320 | 1814 | 206 | 586 | 6  | 9915  |
| OV010-T-R1 | 13413 | 5954 | 1809 | 258 | 656 | 11 | 10924 |
| OV010-T-R2 | 10180 | 6024 | 1832 | 285 | 494 | 2  | 8312  |

---

<sup>a</sup>: the definition of non-T cells is description in Method section “scRNA/TCR-seq data processing”; UMI: Unique Molecular Identifier; MT: mitochondria

**Supplementary Table 3. Treatment-naive HGSOC sampling for flow cytometry analysis. Related to Figure 2.**

| <b>CASE_ID</b> | <b>AGE_AT_DIAGNOSIS</b> | <b>DIAGNOSIS</b> | <b>STAGE</b> | <b>SITE</b>                |
|----------------|-------------------------|------------------|--------------|----------------------------|
| P1             | 56                      | HGSOC            | IVB          | P1-T_R<br>P1-T_L<br>P1-M_O |
| P2             | 55                      | HGSOC            | IIIC         | P2-M_O<br>P2-T_R<br>P2-T_L |
| P3             | 52                      | HGSOC            | IIIC         | P3-T_L<br>P3-M_O           |
| P4             | 49                      | HGSOC            | IIIC         | P4-M_O<br>P4-T_L           |
| P5             | 51                      | HGSOC            | IIIC         | P5-M_O<br>P5-T_R<br>P5-T_L |

M/T:Metastatic/situ lesion, \_TR/L:Right ovary/Left ovary, \_O: Omentum metastatic.

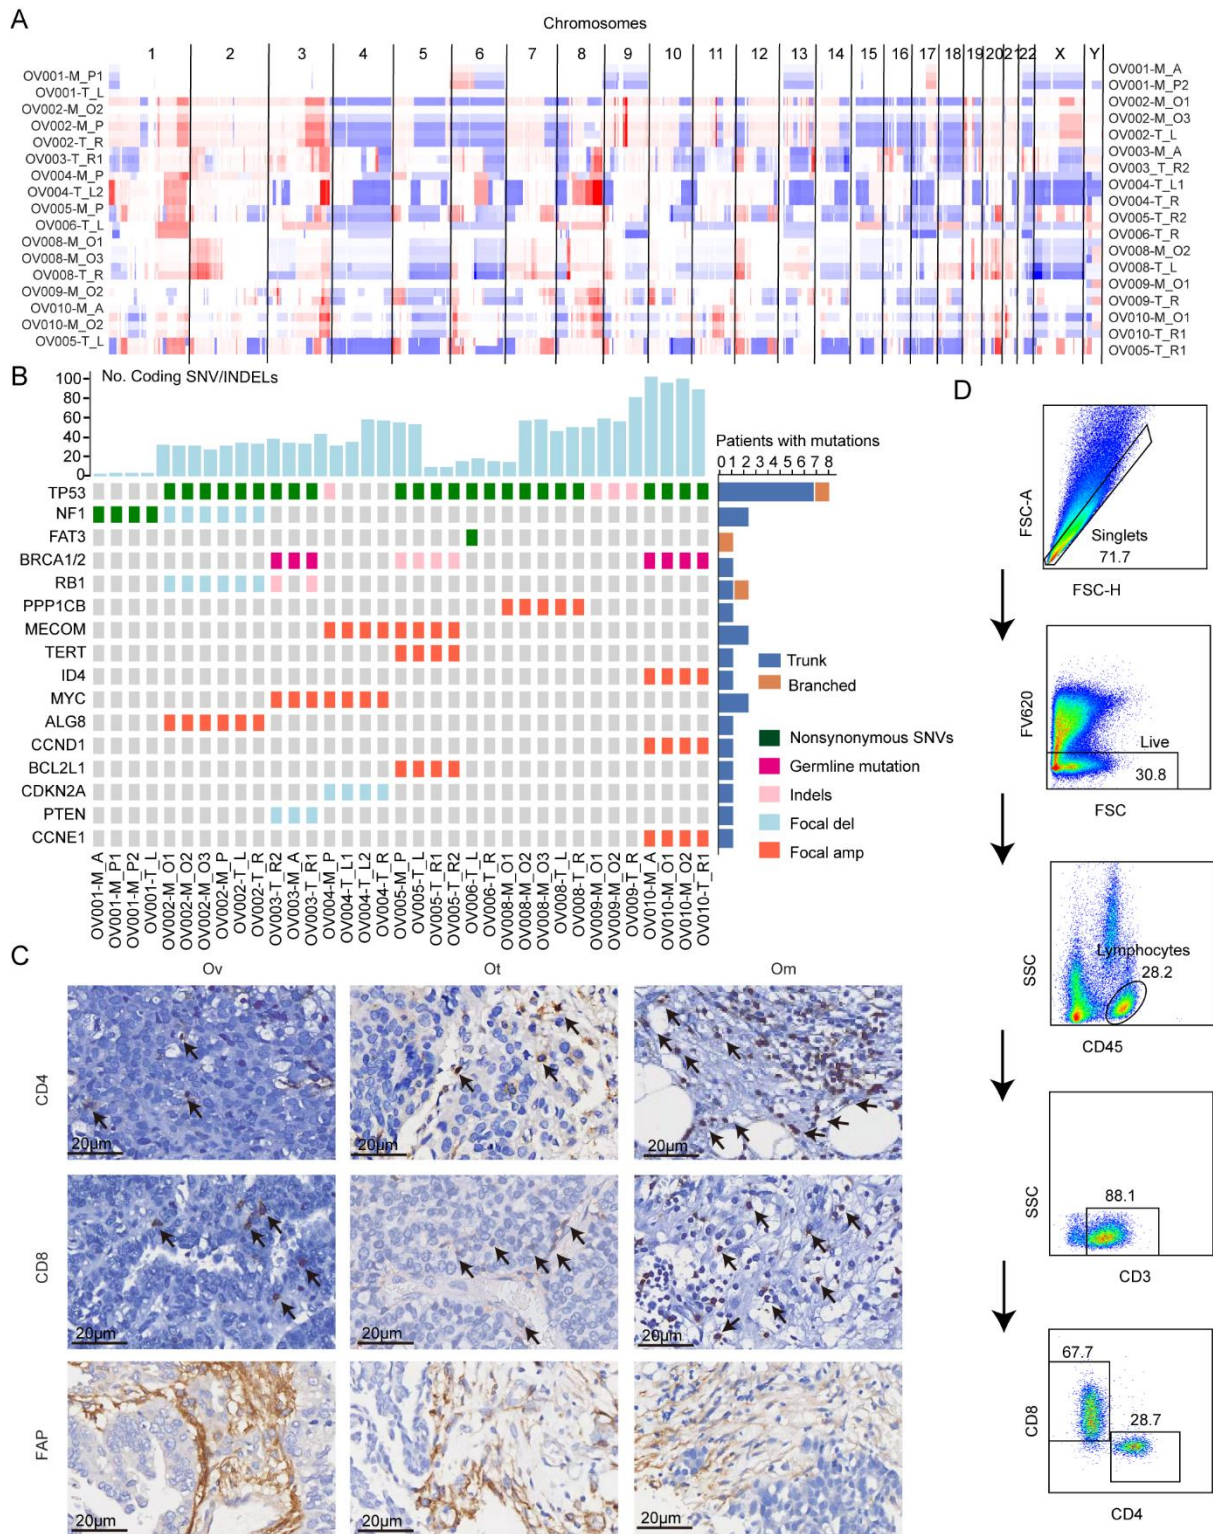

**Figure S1. Sample CNV and mutations overview.** Related to Figure 1.

**A.** DNA copy number profiles of all tumor samples of the HGSOc. M/T: Metastatic/ovarian lesion, \_TR/L: Right ovary/Left ovary, \_O/P/A: Omentum/pelvic/abdominic metastatic. **B.** The distribution of driver mutations across multi-region from 9 OV patients. The upper panel displays the number of coding mutations in each region; the bottom panel shows the mutation types of driver genes and the prevalence of driver genes



shown on the left. M\_A = abdominal metastasis; M\_P = pelvic metastasis; M\_O = omental lesions; T\_L = left ovarian lesions; T\_R = right ovarian lesions. **C.** Representative images of IHC with indicated antibodies in tumor tissues (200x). Arrows indicate typical T cells. ovarian (Ov), omental (Om), and other distant metastatic (Ot). **D.** CD4 and CD8 T cells, were quantified using flow cytometry according to their cell-surface markers. Antibodies for CD45, CD3, CD4, CD8 and live/dead dye were used to analyses target cells.

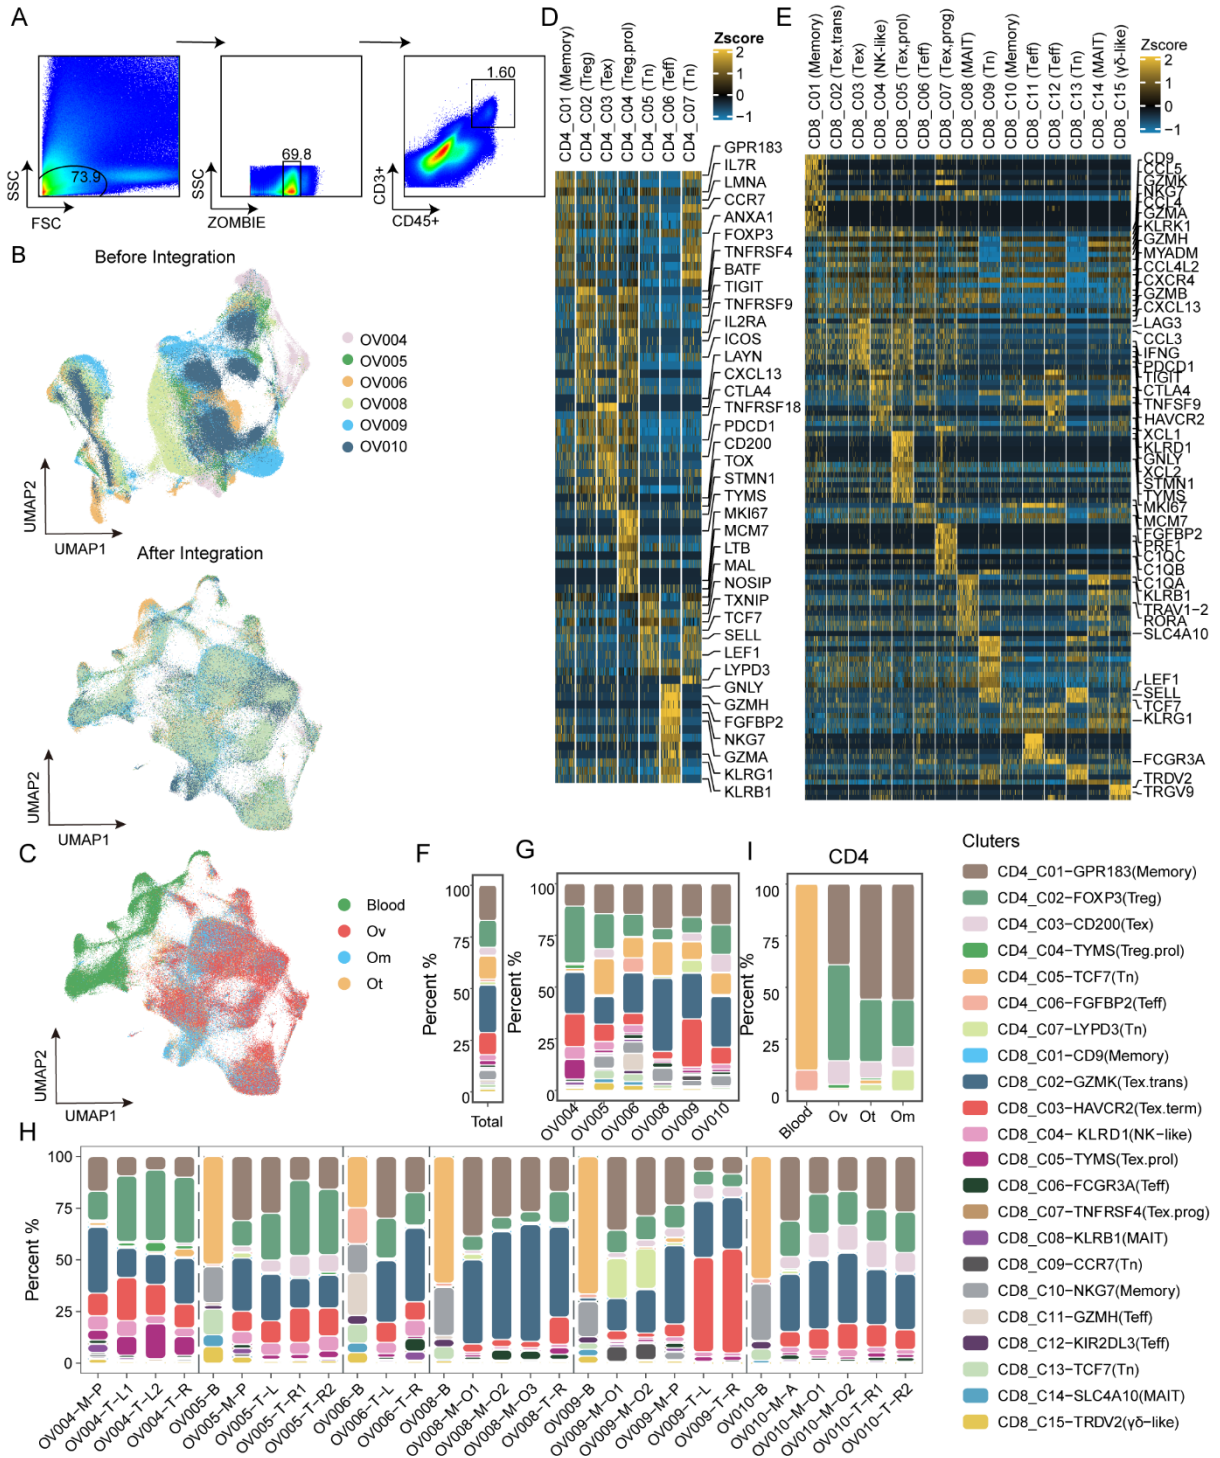

**Figure S2. Distinct characteristics and differential composition of TILs across different lesions in HGSOc by scRNA-seq.** Related to Figure 2.

**A.** T cells, were sorted using flow cytometry according to their cell-surface markers. Antibodies for CD45, CD3, and zombie dye were used to enriched target cells. **B.** Uniform manifold approximation and projection (UMAP) of 227,769 single CD3+ T cells colored by patient identity before and after CCA integration. **C.** UMAP of CD3+ T cells colored by patient identity.

T cells showing the formation of positions where the cells from, including blood and solid tumor lesions, which including ovarian (Ov), omental (Om), and other distant metastatic (Ot). **D-E.** Heatmap of differentially expressed genes between cells belonging to each CD4<sup>+</sup> cluster and CD8<sup>+</sup> cluster. **F-H.** Bar plot indicating relative proportions of each cell cluster detected in total CD3<sup>+</sup> T cells, in different patients, and in different samples. **I.** Bar plot indicating relative proportions of each CD4<sup>+</sup> T cell cluster detected in blood and solid tumor lesions, including ovarian (Ov), omental (Om), and other distant metastatic (Ot). M\_A=abdominal metastasis; M\_P=pelvic metastasis; M\_O=omental lesions; T\_L=left ovarian lesions; T\_R=right ovarian lesions.

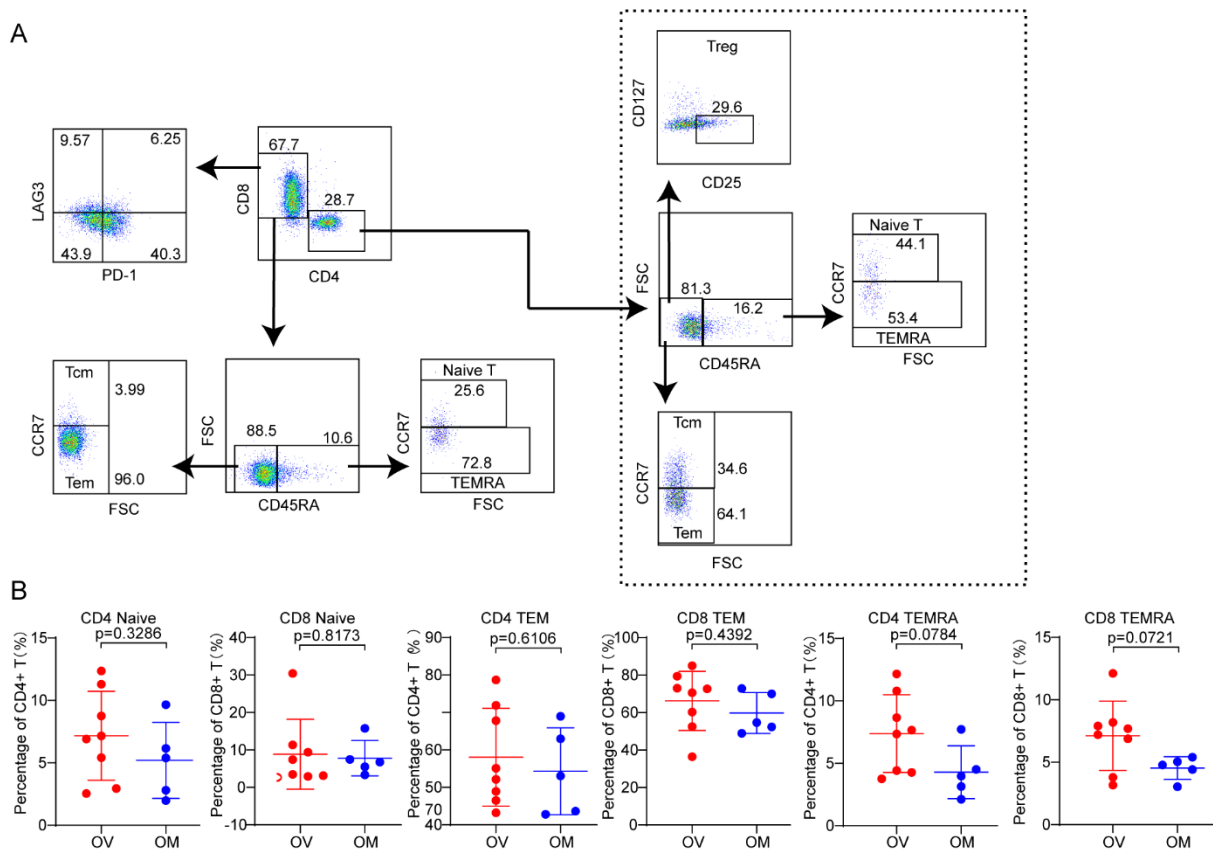

**Figure S3. Flow cytometry analysis of the composition of T cell clusters in different lesions.** Related to Figure 2.

**A.** Flow cytometry analysis of CD8<sup>+</sup> and CD4<sup>+</sup> T cell clusters. Representative graphs showing gating strategy.

**B.** Quantification of CD4<sup>+</sup> naïve (CD45<sup>+</sup>CD3<sup>+</sup>CD4<sup>+</sup>CD45RA<sup>+</sup>CCR7<sup>+</sup>), TEM (CD45<sup>+</sup>CD3<sup>+</sup>CD4<sup>+</sup>CD45RA<sup>-</sup>CCR7<sup>-</sup>), TEMRA (CD45<sup>+</sup>CD3<sup>+</sup>CD4<sup>+</sup>CD45RA<sup>+</sup>CCR7<sup>-</sup>) and CD8<sup>+</sup> naïve (CD45<sup>+</sup>CD3<sup>+</sup>CD8<sup>+</sup>CD45RA<sup>+</sup>CCR7<sup>+</sup>), TEM (CD45<sup>+</sup>CD3<sup>+</sup>CD8<sup>+</sup>CD45RA<sup>-</sup>CCR7<sup>-</sup>), TEMRA (CD45<sup>+</sup>CD3<sup>+</sup>CD8<sup>+</sup>CD45RA<sup>+</sup>CCR7<sup>-</sup>) cells proportions in tumors from each sample, respectively. ovarian samples=8, omental samples=5. p values were determined by student's t test.

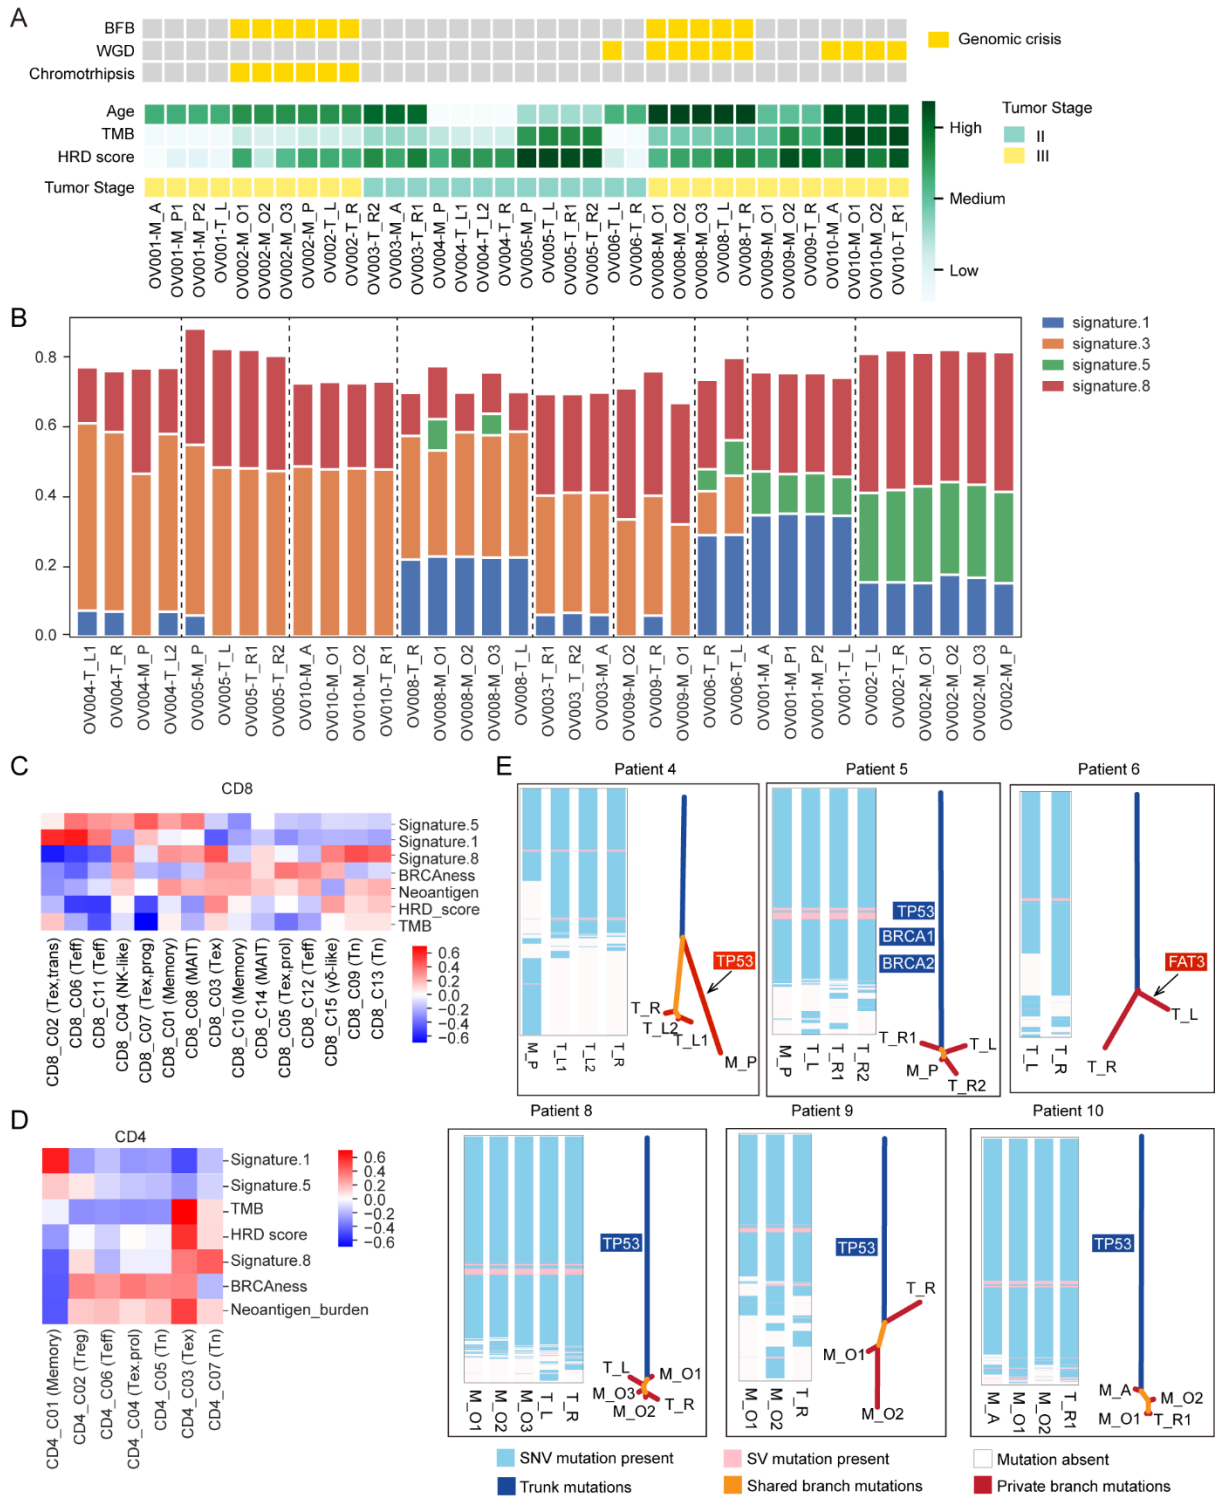

**Figure S4. Patient derived TMB difference is associated with skewed T cell differentiation.** Related to Figure 3.

**A.** The panels exhibit clinal information and genomic crisis events in each sample. BFB = breakage-fusion-bridge, WGD = whole genome duplication, TMB = tumor mutation burden, HRD = homologous recombination deficiency. **B.** The distribution of mutational signatures among tumor regions. **C-D.** Correlation between the cell

proportion of CD8<sup>+</sup> (**C**), CD4<sup>+</sup> (**D**) populations and the genomic features, including mutational signatures, TMB, HRD score. **E**. The evolutionary tree for each patient. M\_A = abdominal metastasis; M\_P = pelvic metastasis; M\_O = omental lesions; T\_L = left ovarian lesions; T\_R = right ovarian lesions.

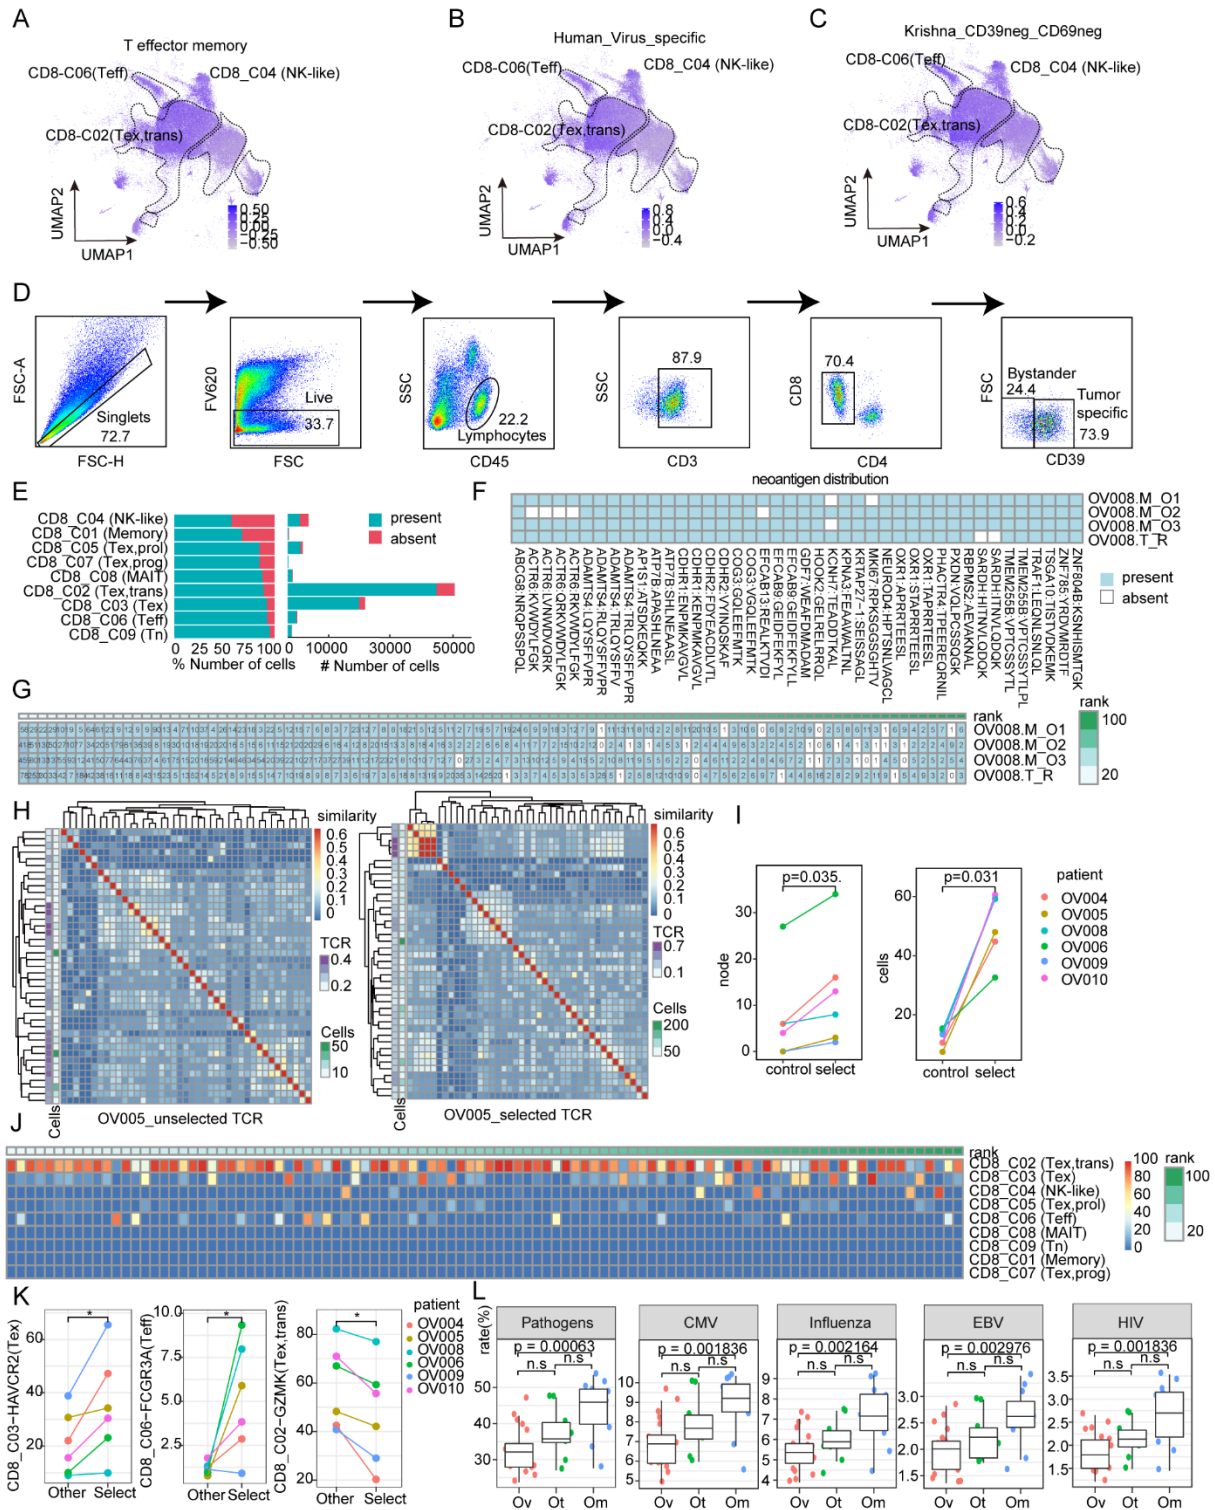

**Figure S5. Characterization of CD8<sup>+</sup> tumor-infiltrating T cells in HGSOC.** Related to Figure 3.

**A-C.** UMAP of CD8<sup>+</sup> tumor-infiltrating cells colored according to different gene signatures scores. (A) T effect memory signature score, (B) human virus specific signature score, (C) CD39<sup>+</sup>CD69<sup>-</sup> signature score. **D.** Flow cytometry analysis of CD8<sup>+</sup> bystander and tumor-specific T cell clusters. Representative graphs showing gating strategy. **E.** Bar plots indicating relative proportions (left) and cell number (right) with or without TCR in tissue

CD8<sup>+</sup> clusters. **F.** MHC class I restricted neoantigens peptides were predicted from the data of WGS. Image of the neoantigens distribution in OV008 patient. **G.** The distribution of TOP100 clonal TCR across the sites. The number in each square stands for the same TCR cell number. **H.** The pairwise similarity of CD8 TCRs among selected neoantigen-associated (right panel) and control (left panel) from patient OV005. Unique CDR3 ( $\alpha$  and  $\beta$  chain) sequences are arranged across rows and columns. The similarity was calculated by sharing of triplet amino acids in CDR3. The color showing similarity in the heatmap was restricted with less than 0.6 similarity. **I.** Comparison of similarity and cells between “select” and control. The mean of cell count of TCR in each patient. The pairwise TCR sequences with the similarity with more than 0.5 were connected and satisfied TCRs in select or control group created a network. In the network, the nodes were counted in each patient for select and control groups, respectively. Wilcoxon rank-sum test was performed. **J.** Representative image of distributions of cell clusters with top 100 clonal TCRs. **K.** The proportions of selected neoantigen associated TCRs and other TCRs in three T cell clusters. All T cells were divided into selected TCRs and remaining others. The selected TCRs were inferred in terms of the presence of neoantigens. Wilcoxon rank-sum test was performed. **L.** The content of disease-associated TCRs derived from bulk-TCR data in each sample. Top 9000 CDR3 of beta chain ranked by frequency were used to examine the disease-associated TCRs from three database: VDJdb, McPAS-TCR and TBAdb. Wilcoxon rank-sum test was performed.



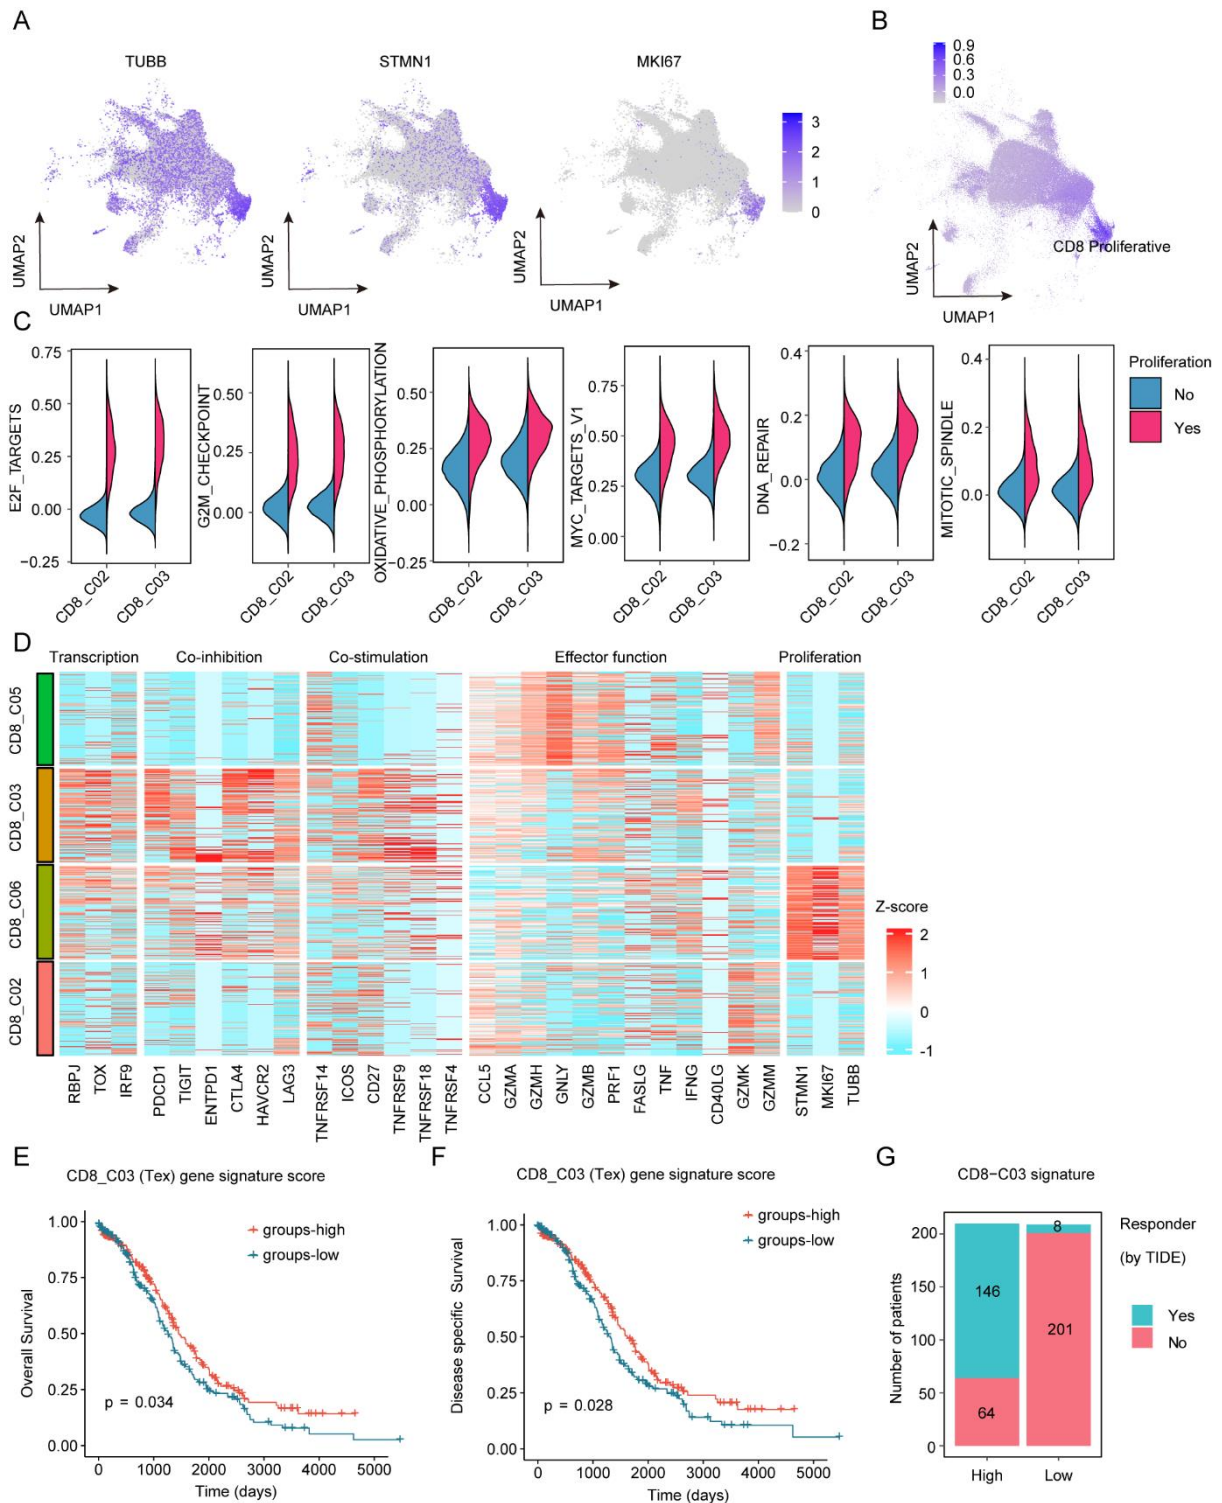

**Figure S6. Characterization of proliferative CD8<sup>+</sup> tumor-infiltrating cells.** Related to Figure 4.

**A.** UMAP of all CD8<sup>+</sup> tumor-infiltrating cells colored by proliferation markers. **B.** UMAP of all CD8<sup>+</sup> tumor-infiltrating cells colored by proliferation signature. **C.** Comparison of gene signatures between T cells with and without proliferation in CD8\_C02 and CD8\_C03 clusters. Each color represents a proliferation state. **D.**

Heatmap depicting the expression of a panel of T cell related genes. **E-F** The Kaplan-Meier overall survival (**E**)

and disease specific survival (**F**) curves of TCGA ovarian cancer patients grouped by the gene signature expression (divided by the median value of the CD8\_C03 gene signature score) of CD8\_C03 (Tex) cluster. **G.** TCGA ovarian patients with good or poor ICB response were evaluated by TIDE (see methods) and then were grouped by the gene signature expression (divided by the median value of the CD8\_C03 gene signature score) CD8\_C03 (Tex) cluster.

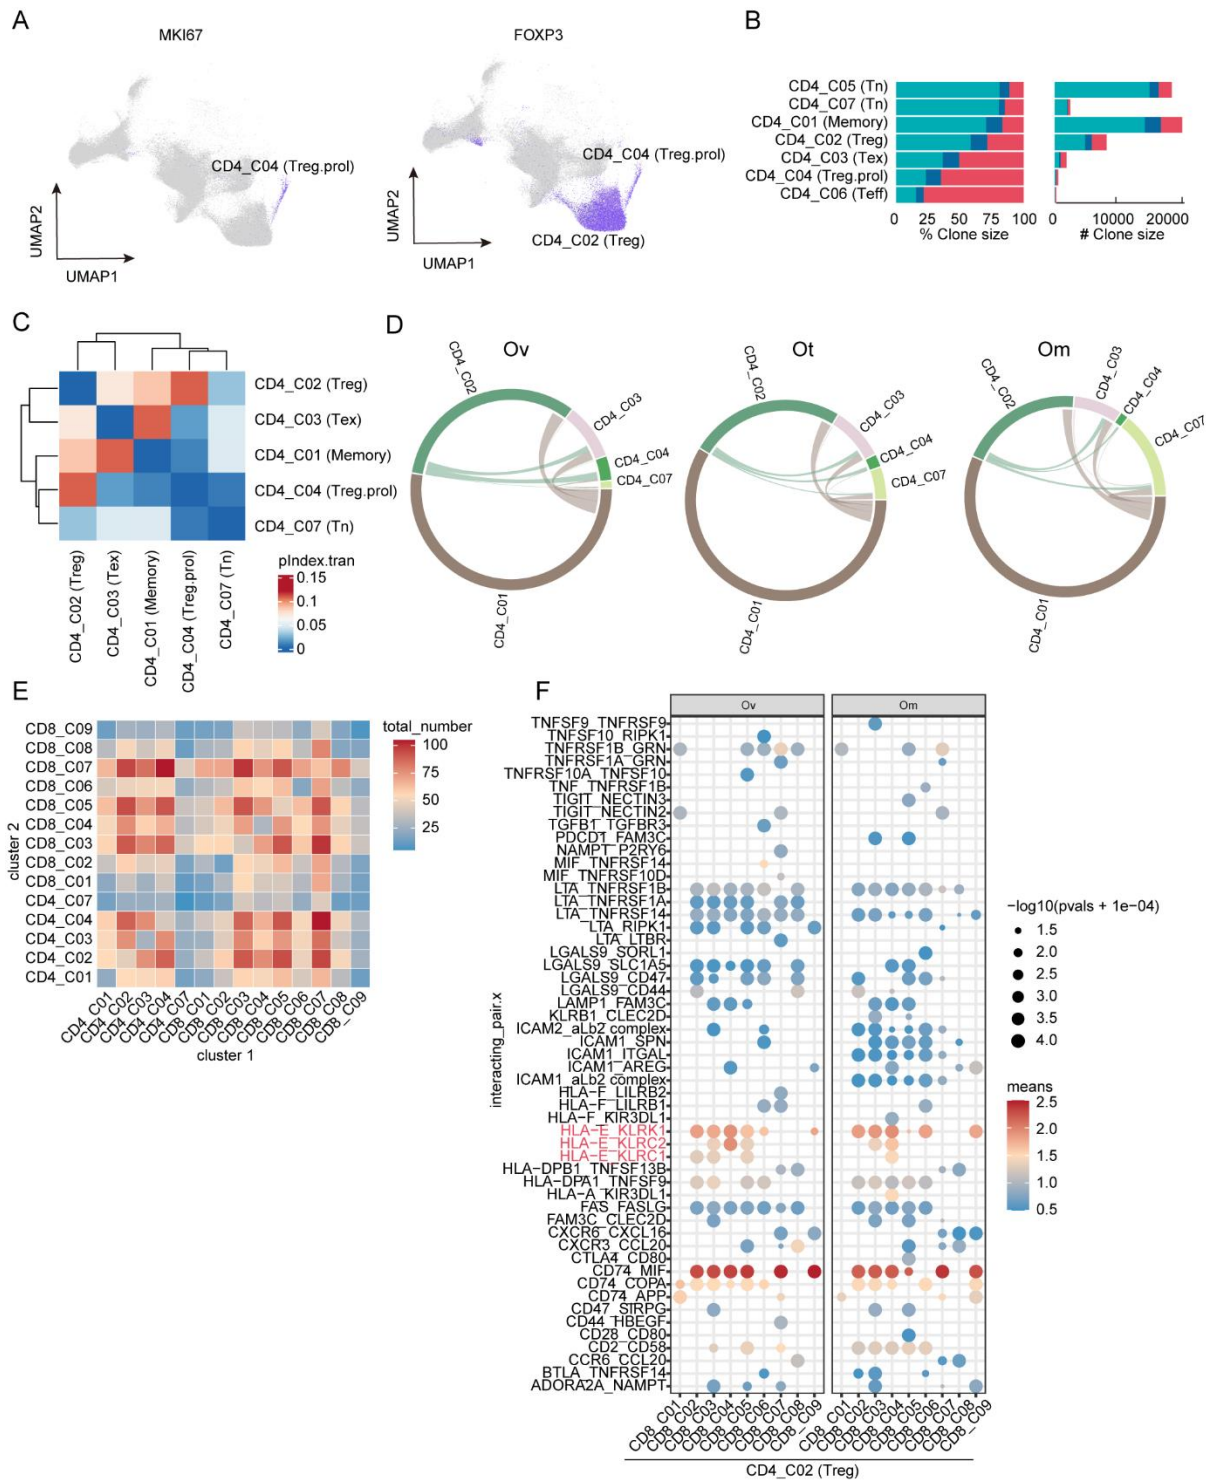

**Figure S7. Characterization of TCR of CD4<sup>+</sup> cells in HGSOC.** Related to Figure 6.

**A.** UMAP of all CD8<sup>+</sup> tumor-infiltrating cells colored by *MKI67* and *FOXP3*. **B.** Bar plots indicating relative proportions (left) and number (right) of TCR with different clone size. **C.** Heatmap showing the transition of all CD4<sup>+</sup> tumor-infiltrating cells quantified by pSTARTRAC-trans indices for each patient (n = 6). **D.** Circle plot of clonal sharing between clusters in all CD4<sup>+</sup> tumor-infiltrating cells in different solid tumor sites,

including ovarian (Ov), omental (Om), and other distant metastatic (Ot). The unique TCRs within each cluster were not shown. **E.** Heatmap of cluster-specific receptor-ligand interactions inferred by CellPhoneDB. Color indicates the total number of receptor and ligand genes pairs between each two TIL clusters. **F.** Heatmap of cluster-specific receptor-ligand interactions inferred by CellPhoneDB. Shown are inferred interactions between CD4\_C02 (Treg) cluster and all TIL CD8<sup>+</sup> T clusters in ovarian (Ov) and omental (Om). Circle size indicates significance of interaction and circle color indicates mean expression of receptor and ligand genes for each pair.

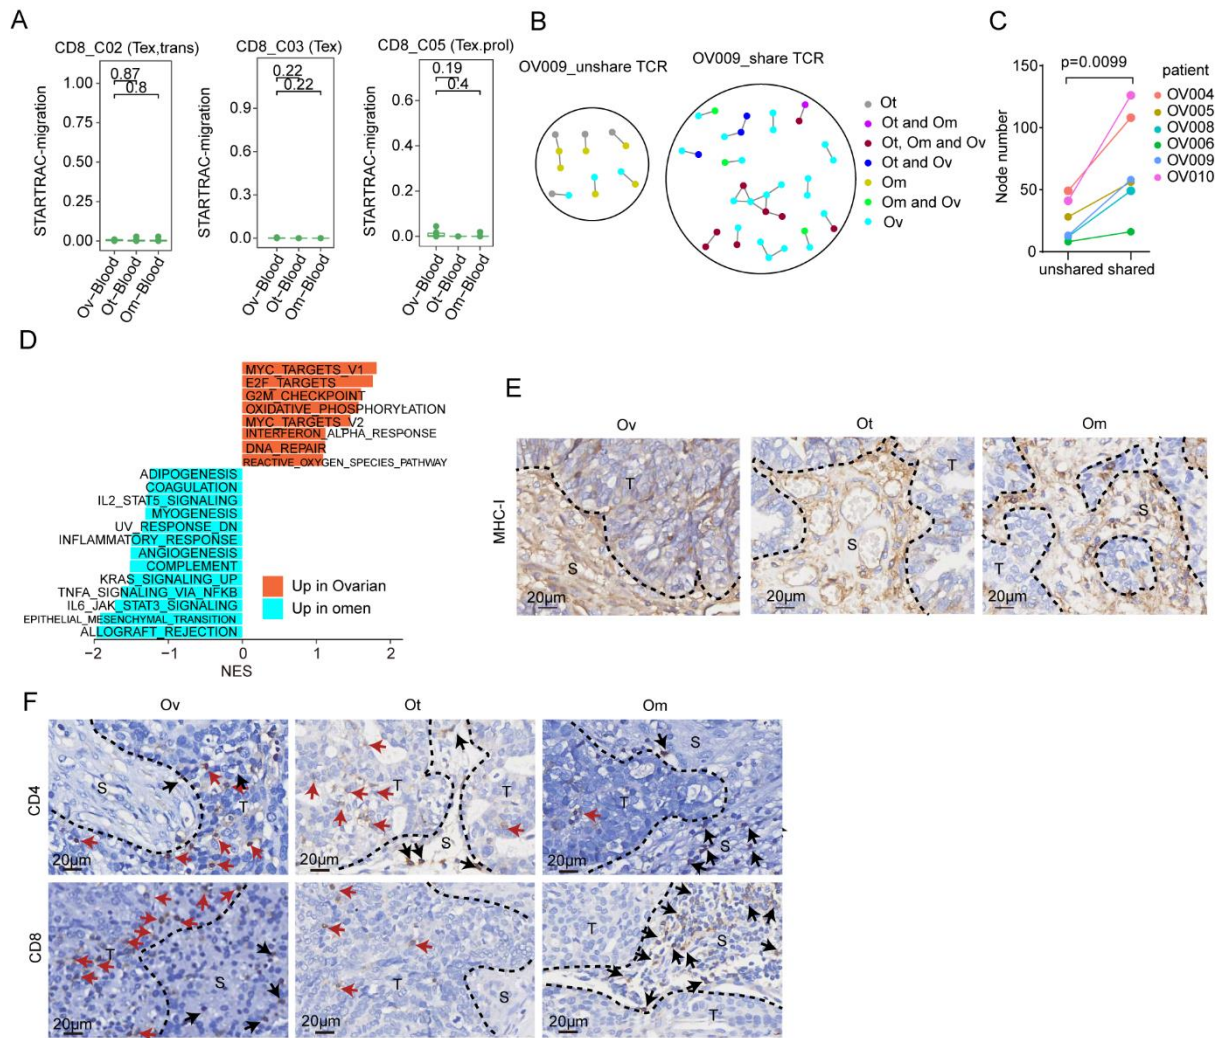

**Figure S8. TCR from different sites of CD8<sup>+</sup> tumor-infiltrating cells.** Related to Figure 7.

**A.** Developmental migration of CD8<sup>+</sup> tumor-infiltrating cells between blood and each solid tumor sites quantified by pSTARTRAC-migr indices for each patient (n = 6), Kruskal–Wallis test. **B.** Network diagrams showing shared between transitional cluster (CD8\_C02) and dysfunctional clusters (CD8\_C03 and CD8\_C05) and unshared TCR sequences that have the similarity more than 0.5 to at least one of other TCRs for OV009. The similarity was calculated by sharing of triplet amino acids in CDR3 (both  $\alpha$  and  $\beta$  chains). **C.** The number of nodes of the network diagrams were counted and compared in individual level. Paired t test. **D.** Analysis of significantly differentially regulated pathways between ovarian and omental sites on bulk RNA-seq data by GSEA. **E.** Representative images of IHC with MHC-I in tumor tissues (200x). Dotted line indicated the margin

of the tissues. T=tumor, S=stromal. **F.** Representative images of IHC with CD4 and CD8 in tumor tissues (200x). Red arrows indicate typical T cells in tumor area and black arrows indicate typical T cells in stroma area. Dotted line indicated the margin of the tissues. T=tumor, S=stromal.

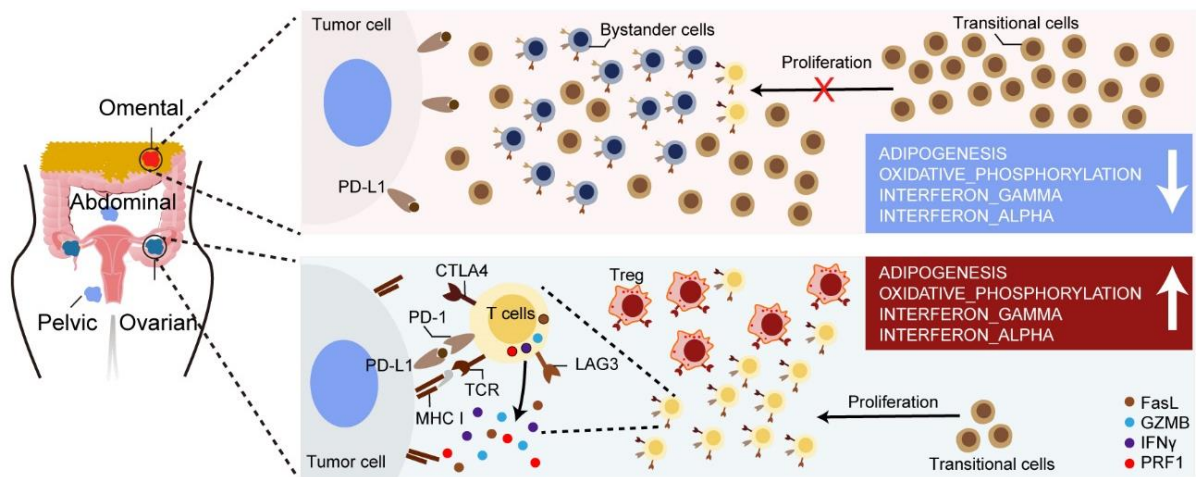

**Figure S9. | Proposed model of detailed immune landscape across different lesions in HGSOc.** Related to Figure 7.

Ovarian tumors were characterized by an immunosuppressive environment consisting of Tregs and three different populations of exhausted  $CD8^+$  T cells as well as an exhausted  $CD4^+$  T cell population that likely acquired an exhausted phenotype through interaction with tumor antigens in the local ovarian ecosystem (bottom). Omental lesions appear to consist primarily of non-tumor-specific bystander cells with no response to tumor specific antigens (upper). Increased expression of MHC-I, adipogenesis and interferon signaling and E2F mediated differentiation may contribute to high level of exhausted T cells in ovarian tumor sites.
